# Supplementary material for: Metformin ameliorates olanzapine-induced disturbances in POMC neuron number, axonal projection, and hypothalamic leptin resistance
Source: PubMed Central journal article supplement — BMB Rep. 2022 Jun 30;55(6):293–8. doi: 10.5483/BMBRep.2022.55.6.026 (PMC9252891; doi:10.5483/bmbrep.2022.55.6.026), 2022-06-30
Supplement: bmb-55-6-293-supple.pdf [file bmb-55-6-293-supple.pdf]

# Supplementary data

## Title

Metformin ameliorates olanzapine-induced disturbances in POMC neuron number, axonal projection, and hypothalamic leptin resistance

## Authors

Jaedeok Kim<sup>1,3</sup>, Nayoung Lee<sup>1,3</sup>, Sang Bum Suh<sup>2,3</sup>, Sooyeon Jang<sup>1</sup>,  
Saeha Kim<sup>1</sup>, Dong-Gyu Kim<sup>1</sup>, Jong Kook Park<sup>1</sup>, Keun-Wook Lee<sup>1</sup>,  
Soo Young Choi<sup>1</sup>, and Chan Hee Lee<sup>1,\*</sup>

## Affiliation

<sup>1</sup>Department of Biomedical Sciences, Hallym University, Chuncheon 24252, Korea;

<sup>2</sup>University of Ulsan College of Medicine, Seoul 05505, Korea;

<sup>3</sup>These authors contributed equally.

## Running title

Effects of olanzapine and metformin on POMC neuron

## Keywords

Atypical antipsychotic drug, Olanzapine, Metformin, POMC neuron, Leptin resistance

## Corresponding author's information

Chan Hee Lee, Ph.D.

+82-33-248-2117

chl22@hallym.ac.kr

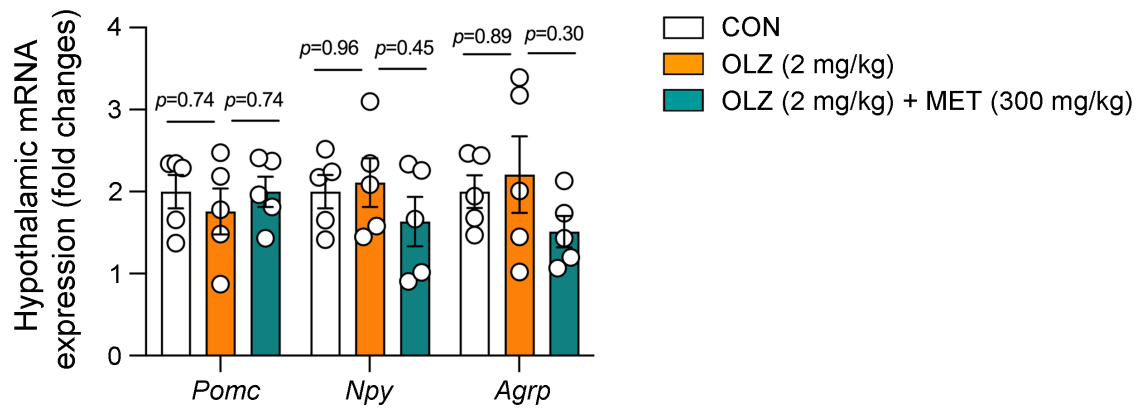

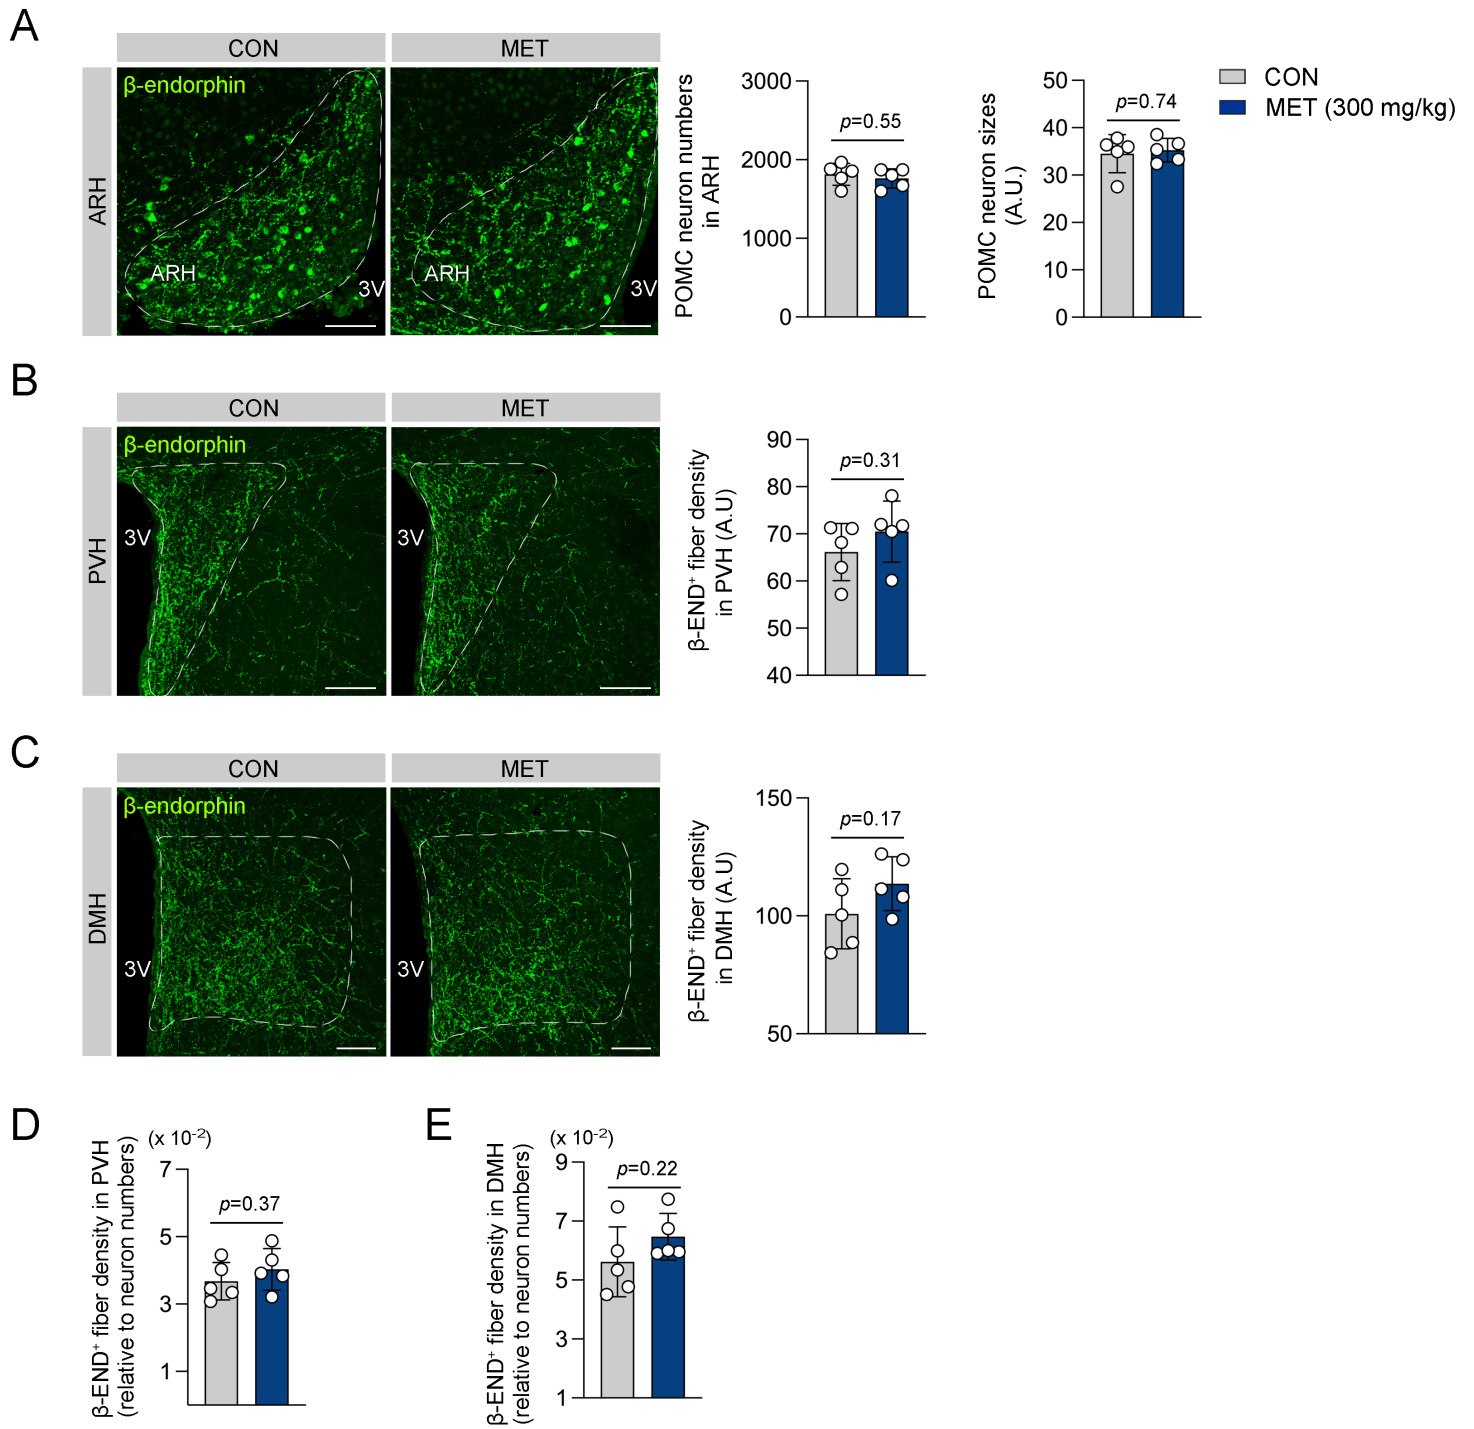

## Supplementary Table 1

| <b>Gene</b>  | <b>Primer sequence 5'→3'</b> |                     |
|--------------|------------------------------|---------------------|
|              | <b>Forward</b>               | <b>Reverse</b>      |
| <i>Agrp</i>  | ACAACTGCAGACCGAGCA           | GACGCGGAGAACGAGACT  |
| <i>Gapdh</i> | CCTGTTGCTGTAGCCGTAT          | ACTCTTCCACCTTCGATGC |
| <i>Npy</i>   | GGACTGACCCTCGCTCTA           | TCGCAGAGCGGAGTAGTA  |
| <i>Pomc</i>  | CAGGTCCTGGAGTCCGAC           | CATGAAGCCACCGTAACG  |
